# Supplementary material for: Expert Perspectives on Controversies in Castration-Sensitive Prostate Cancer Management: Narrative Review and Report of the First US Prostate Cancer Conference Part 1
Source: PubMed Central journal article supplement — JU Open Plus. Author manuscript; Available in PMC 2024 May 21. (PMC11108024; doi:10.1097/ju9.0000000000000137), 2024-04-15
Supplement: NIHMS1990826-supplement-Supplement.pdf [file NIHMS1990826-supplement-Supplement.pdf]

**Supplemental Appendix 1.** Questions and Expert Responses (N=38) From USPPC Sessions on ADT in Prostate Cancer, High-Risk Localized Prostate Cancer, Biochemical Recurrence, Metastasis-Directed Therapy, and mCSPC

**1. ADT in Prostate Cancer**

| <b>1.1 In clinical practice, what should be the target testosterone (T) level for a patient receiving an LHRH agonist/antagonist for androgen deprivation therapy (ADT)?</b> |           |           |
|------------------------------------------------------------------------------------------------------------------------------------------------------------------------------|-----------|-----------|
| <b>Answer</b>                                                                                                                                                                | <b>#</b>  | <b>%</b>  |
| <50 ng/dL                                                                                                                                                                    | 10        | 26        |
| <30 ng/dL                                                                                                                                                                    | 1         | 3         |
| <b>&lt;20 ng/dL</b>                                                                                                                                                          | <b>26</b> | <b>68</b> |
| Not sure                                                                                                                                                                     | 1         | 3         |
| Does not matter                                                                                                                                                              | 0         | 0         |
| Abstain                                                                                                                                                                      | 0         | 0         |

| <b>1.2 In your opinion, how important is it that LHRH agents be administered on time, ie, exactly 84 days for a 84-day preparation?</b> |           |           |
|-----------------------------------------------------------------------------------------------------------------------------------------|-----------|-----------|
| <b>Answer</b>                                                                                                                           | <b>#</b>  | <b>%</b>  |
| It is important to deliver exactly on schedule                                                                                          | 6         | 16        |
| <b>Within 2 weeks is acceptable</b>                                                                                                     | <b>28</b> | <b>74</b> |
| 3 calendar months between doses is acceptable                                                                                           | 3         | 8         |
| Abstain                                                                                                                                 | 1         | 3         |

| <b>1.3 Do you monitor testosterone (T) levels regularly in your patients who are receiving ADT?</b> |           |           |
|-----------------------------------------------------------------------------------------------------|-----------|-----------|
| <b>Answer</b>                                                                                       | <b>#</b>  | <b>%</b>  |
| <b>Yes</b>                                                                                          | <b>28</b> | <b>74</b> |
| No                                                                                                  | 2         | 5         |
| Sometimes                                                                                           | 6         | 16        |
| Rarely                                                                                              | 1         | 3         |
| Abstain                                                                                             | 1         | 3         |

| <b>1.4 When initiating ADT, when should T levels be measured?</b> |           |           |
|-------------------------------------------------------------------|-----------|-----------|
| <b>Answer</b>                                                     | <b>#</b>  | <b>%</b>  |
| <b>Before therapy and then every 3 months</b>                     | <b>20</b> | <b>53</b> |
| Every 3 months until T remains less than 20 ng/dL                 | 2         | 5         |
| At 3 months, then when the PSA elevates                           | 8         | 21        |
| At 6 months, and then periodically, as needed                     | 0         | 0         |
| Variable depending on the individual patient                      | 7         | 18        |
| Abstain                                                           | 1         | 3         |

| <b>1.5 Does failure to monitor T lead to an erroneous diagnosis of castration-resistant prostate cancer (CRPC)?</b> |           |           |
|---------------------------------------------------------------------------------------------------------------------|-----------|-----------|
| <b>Answer</b>                                                                                                       | <b>#</b>  | <b>%</b>  |
| <b>Yes</b>                                                                                                          | <b>28</b> | <b>74</b> |
| No                                                                                                                  | 6         | 16        |
| Not sure                                                                                                            | 1         | 3         |
| Abstain                                                                                                             | 3         | 8         |

| <b>1.6 Are randomized controlled trials (RCTs) necessary to evaluate any differences in efficacy or safety between LHRH agonists and antagonists?</b> |          |          |
|-------------------------------------------------------------------------------------------------------------------------------------------------------|----------|----------|
| <b>Answer</b>                                                                                                                                         | <b>#</b> | <b>%</b> |
| Yes                                                                                                                                                   | 16       | 42       |
| No                                                                                                                                                    | 8        | 21       |
| Any differences are small and not clinically relevant                                                                                                 | 13       | 34       |
| Abstain                                                                                                                                               | 1        | 3        |

## **2. High-Risk Prostate Cancer**

| <b>2.1 Do you believe that an updated risk stratification methodology is needed?</b>           |          |          |
|------------------------------------------------------------------------------------------------|----------|----------|
| <b>Answer</b>                                                                                  | <b>#</b> | <b>%</b> |
| The NCCN definitions for “high risk” and “very high risk” remain adequate                      | 3        | 8        |
| “High risk” should be defined based on multivariable clinical tools (eg,UCSF- CAPRA, STAR-CAP) | 11       | 29       |
| The definition of “high risk” should be based on clinical plus genomic characteristics         | 21       | 55       |
| Not sure                                                                                       | 1        | 3        |
| Abstain                                                                                        | 2        | 5        |

| <b>2.2 In your opinion, in high-risk prostate cancer, when should bone scan and CT be used?</b>                                |          |          |
|--------------------------------------------------------------------------------------------------------------------------------|----------|----------|
| <b>Answer</b>                                                                                                                  | <b>#</b> | <b>%</b> |
| Bone scan and CT should only be used when prostate-specific membrane antigen (PSMA) PET/CT is not available                    | 16       | 42       |
| Bone scan and CT should still be used to define oligometastatic disease and to define “M1” in applying historical RCT findings | 17       | 45       |
| There is no role for bone scan or CT in 2023                                                                                   | 3        | 8        |
| Not sure                                                                                                                       | 1        | 3        |
| Abstain                                                                                                                        | 1        | 3        |

| <b>2.3 Is PSMA PET/CT appropriate at diagnosis only in men with high-risk disease?</b> |          |          |
|----------------------------------------------------------------------------------------|----------|----------|
| <b>Answer</b>                                                                          | <b>#</b> | <b>%</b> |
| Yes                                                                                    | 21       | 55       |
| No                                                                                     | 14       | 37       |
| Not sure                                                                               | 2        | 5        |
| Abstain                                                                                | 1        | 3        |

| <b>2.4 Is PSMA PET appropriate at diagnosis for all men with unfavorable intermediate or high-risk disease?</b> |          |          |
|-----------------------------------------------------------------------------------------------------------------|----------|----------|
| <b>Answer</b>                                                                                                   | <b>#</b> | <b>%</b> |
| Yes                                                                                                             | 24       | 63       |
| No                                                                                                              | 9        | 24       |
| Not sure                                                                                                        | 5        | 13       |
| Abstain                                                                                                         | 0        | 0        |

| <b>2.5 What should guide management of the pelvis?</b> |          |          |
|--------------------------------------------------------|----------|----------|
| <b>Answer</b>                                          | <b>#</b> | <b>%</b> |
| Pretreatment PSMA PET/CT                               | 16       | 42       |
| Clinical characteristics only                          | 14       | 37       |
| Not sure                                               | 4        | 11       |
| Abstain                                                | 4        | 11       |

| <b>2.6 Is there a role for truly adjuvant radiation therapy (PSA &lt; 0.1) for any subsets of patients after radical prostatectomy (RP)?</b> |          |          |
|----------------------------------------------------------------------------------------------------------------------------------------------|----------|----------|
| <b>Answer</b>                                                                                                                                | <b>#</b> | <b>%</b> |
| Patients with very adverse pathology (eg, T3b, extensive surgical margin, pN+) should get adjuvant radiation                                 | 16       | 42       |
| Postoperative radiation should only be used when PSA is detectable                                                                           | 13       | 34       |
| Postoperative radiation should be solely guided by the Decipher score and/or PORTOS                                                          | 4        | 11       |
| Not sure                                                                                                                                     | 3        | 8        |
| Abstain                                                                                                                                      | 2        | 5        |

| <b>2.7 How should genomic analysis of primary prostate tissue (biopsy or RP) guide intensification of perioperative systemic therapy?</b> |          |          |
|-------------------------------------------------------------------------------------------------------------------------------------------|----------|----------|
| <b>Answer</b>                                                                                                                             | <b>#</b> | <b>%</b> |
| Therapy should be guided by gene mutational analysis (eg, FoundationOne CDx)                                                              | 1        | 3        |
| Therapy should be guided by gene expression analysis (eg, Decipher genomic risk classifier)                                               | 16       | 42       |
| Therapy should be guided by patient preference, comorbidities and/or cost                                                                 | 11       | 29       |
| Not sure                                                                                                                                  | 4        | 11       |
| Abstain                                                                                                                                   | 6        | 16       |

### 3. Biochemically Recurrent Prostate Cancer

| 3.1 For the patient with prior RP, when do you recommend salvage radiotherapy (RT)? |    |    |
|-------------------------------------------------------------------------------------|----|----|
| Answer                                                                              | #  | %  |
| As early as possible (PSA <0.2 ng/mL)                                               | 18 | 47 |
| PSA 0.2-1 ng/mL                                                                     | 19 | 50 |
| PSA 1-5 ng/mL                                                                       | 1  | 3  |
| Not sure                                                                            | 0  | 0  |
| Abstain                                                                             | 0  | 0  |

| 3.2 When do you recommend ADT with salvage RT?                                 |    |    |
|--------------------------------------------------------------------------------|----|----|
| Answer                                                                         | #  | %  |
| Always                                                                         | 8  | 21 |
| Never                                                                          | 0  | 0  |
| Only for those patients with high risk according to polygenic risk score assay | 6  | 16 |
| Only for those with high risk by multivariable clinical tools                  | 19 | 50 |
| Not sure                                                                       | 4  | 11 |
| Abstain                                                                        | 1  | 3  |

| 3.3 Which of the following is the primary parameter you use when initiating BCR therapy postprostatectomy and salvage RT? |    |    |
|---------------------------------------------------------------------------------------------------------------------------|----|----|
| Answer                                                                                                                    | #  | %  |
| PSA doubling time (DT) $\leq$ 9 months and a PSA $\geq$ 1 ng/mL (if post-RP) or PSA $\geq$ 2 ng/mL (if post-RT)           | 25 | 66 |
| Original Gleason score (GS) $\geq$ 8 OR Gleason grade group $\geq$ 4                                                      | 1  | 3  |
| Time until PSA recurrence (BCR) < 6 months                                                                                | 1  | 3  |
| Time until PSA recurrence < 12 months                                                                                     | 2  | 5  |
| PSA $\geq$ 1 ng/mL (if post-RP) or PSA $\geq$ 2 ng/mL (if post-RT)                                                        | 1  | 3  |
| Abstain                                                                                                                   | 8  | 21 |

| 3.4 Which of the following is the optimal diagnostic imaging test for BCR evaluation? |    |    |
|---------------------------------------------------------------------------------------|----|----|
| Answer                                                                                | #  | %  |
| CT abdomen/pelvis                                                                     | 1  | 3  |
| CT chest/abdomen/pelvis                                                               | 0  | 0  |
| Tc bone scan                                                                          | 0  | 0  |
| PSMA PET scan                                                                         | 34 | 89 |
| Bone scan and CT                                                                      | 2  | 5  |
| Not sure                                                                              | 1  | 3  |
| Abstain                                                                               | 0  | 0  |

| <b>3.5 Will conventional imaging still be routinely utilized in clinical practice in 5 years?</b> |          |          |
|---------------------------------------------------------------------------------------------------|----------|----------|
| <b>Answer</b>                                                                                     | <b>#</b> | <b>%</b> |
| Yes                                                                                               | 15       | 39       |
| No                                                                                                | 21       | 55       |
| Abstain                                                                                           | 2        | 5        |

| <b>3.6 Which of the following end points would prove ADT plus an androgen receptor inhibitor (ARI) was superior to ADT alone for the treatment of nmHSPC?</b> |          |          |
|---------------------------------------------------------------------------------------------------------------------------------------------------------------|----------|----------|
| <b>Answer</b>                                                                                                                                                 | <b>#</b> | <b>%</b> |
| 6-month delay in PSA progression                                                                                                                              | 0        | 0        |
| 6-month benefit in metastasis-free survival (MFS)                                                                                                             | 7        | 18       |
| 12-month benefit in MFS                                                                                                                                       | 16       | 42       |
| Increase in overall survival (OS)                                                                                                                             | 9        | 24       |
| 12-month delay to CRPC                                                                                                                                        | 2        | 5        |
| 24-month delay to CRPC                                                                                                                                        | 0        | 0        |
| Abstain                                                                                                                                                       | 4        | 11       |

| <b>3.7 Germline testing is currently recommended for all men with high-risk, very high-risk, and metastatic prostate cancer. Do you recommend germline testing for men with BCR?</b> |          |          |
|--------------------------------------------------------------------------------------------------------------------------------------------------------------------------------------|----------|----------|
| <b>Answer</b>                                                                                                                                                                        | <b>#</b> | <b>%</b> |
| No, I only order if there are metastases                                                                                                                                             | 4        | 11       |
| No, I generally do not order germline testing unless there is a strong family history, or the patient is from a high-risk population                                                 | 14       | 37       |
| Yes, BCR is between very high-risk and metastatic disease, so germline testing is clearly indicated                                                                                  | 20       | 53       |

| <b>3.8 When considering the results from FORMULA 509 in the context of the RADICALS HD results, what approach to ADT do you recommend for men receiving Salvage radiation therapy after RP and a PSA &gt;0.5?</b> |          |          |
|-------------------------------------------------------------------------------------------------------------------------------------------------------------------------------------------------------------------|----------|----------|
| <b>Answer</b>                                                                                                                                                                                                     | <b>#</b> | <b>%</b> |
| ADT x 6 months                                                                                                                                                                                                    | 13       | 34       |
| ADT x 24 months                                                                                                                                                                                                   | 15       | 39       |
| ADT + Abiraterone + apalutamide x 6 months                                                                                                                                                                        | 2        | 5        |
| Radiotherapy alone without ADT                                                                                                                                                                                    | 1        | 3        |
| Other                                                                                                                                                                                                             | 4        | 11       |
| Abstain                                                                                                                                                                                                           | 3        | 8        |

**3.9** When considering the results from FORMULA 509 in the context of the RADICALS HD results, what approach to ADT do you recommend for men receiving Salvage radiation therapy after RP and a PSA [ $<0.5$ ]?<sup>a</sup>

| <b>Answer</b>                             | <b>#</b> | <b>%</b> |
|-------------------------------------------|----------|----------|
| ADT x 6 months                            | 15       | 41       |
| ADT x 24 months                           | 4        | 11       |
| ADT + Abiraterone + apalutamide x6 months | 3        | 8        |
| alone without ADT                         | 10       | 27       |
| Other                                     | 2        | 5        |
| Abstain                                   | 3        | 8        |

<sup>a</sup>During the live PROST8CON meeting, the version of question 3.9 pushed to panel members errantly omitted the PSA level shown in square brackets. Verbal instructions were given to all attendees to consider the question for patients with PSA levels less than 0.5 ng/mL.

#### 4. Metastasis-Directed Therapy

| 4.1 Do you offer treatment with MDT to patients with oligometastatic de novo mHSPC treated with standard of care systemic therapy and radiotherapy to the primary site? |    |    |
|-------------------------------------------------------------------------------------------------------------------------------------------------------------------------|----|----|
| Answer                                                                                                                                                                  | #  | %  |
| Usually                                                                                                                                                                 | 22 | 58 |
| Sometimes                                                                                                                                                               | 11 | 29 |
| Never                                                                                                                                                                   | 4  | 11 |
| Abstain                                                                                                                                                                 | 1  | 3  |

| 4.2 What is your preferred type of MDT for extrapelvic metastatic disease (ie, bone, lung, para-aortic lymph nodes)? |    |    |
|----------------------------------------------------------------------------------------------------------------------|----|----|
| Answer                                                                                                               | #  | %  |
| Radiotherapy (ie, stereotactic ablative radiotherapy [SABR]/ stereotactic body radiation therapy [SBRT])             | 36 | 95 |
| Surgical resection/lymphadenectomy                                                                                   | 0  | 0  |
| Cryotherapy                                                                                                          | 0  | 0  |
| I do not recommend MDT in these patients                                                                             | 0  | 0  |
| Abstain                                                                                                              | 2  | 5  |

| 4.3 Would you order a PSMA PET/CT prior to starting therapy for a patient diagnosed with oligometastatic de novo mHSPC based on CT and bone scan (assuming insurance coverage)? |    |    |
|---------------------------------------------------------------------------------------------------------------------------------------------------------------------------------|----|----|
| Answer                                                                                                                                                                          | #  | %  |
| Usually                                                                                                                                                                         | 22 | 58 |
| Sometimes                                                                                                                                                                       | 13 | 34 |
| Never                                                                                                                                                                           | 2  | 5  |
| Abstain                                                                                                                                                                         | 1  | 3  |

| 4.4 If all sites of metastatic disease are treated with MDT, the primary site is treated with radiotherapy, and the patient receives optimal systemic therapy (ie, ADT plus androgen receptor signaling inhibitor [ARSI]), what is the duration of systemic therapy you would use? |    |    |
|------------------------------------------------------------------------------------------------------------------------------------------------------------------------------------------------------------------------------------------------------------------------------------|----|----|
| Answer                                                                                                                                                                                                                                                                             | #  | %  |
| I do not recommend systemic therapy                                                                                                                                                                                                                                                | 2  | 5  |
| 6 months                                                                                                                                                                                                                                                                           | 8  | 21 |
| 12 months                                                                                                                                                                                                                                                                          | 3  | 8  |
| 24 months                                                                                                                                                                                                                                                                          | 15 | 39 |
| Treat to progression                                                                                                                                                                                                                                                               | 6  | 16 |
| Abstain                                                                                                                                                                                                                                                                            | 4  | 11 |

| <b>4.5 Do you offer treatment with MDT for patients with oligorecurrent mHSPC diagnosed by conventional imaging (CT/bone scan)?</b> |          |          |
|-------------------------------------------------------------------------------------------------------------------------------------|----------|----------|
| <b>Answer</b>                                                                                                                       | <b>#</b> | <b>%</b> |
| Usually                                                                                                                             | 15       | 39       |
| Sometimes                                                                                                                           | 20       | 53       |
| Never                                                                                                                               | 3        | 8        |
| Abstain                                                                                                                             | 0        | 0        |

| <b>4.6 How many metastatic sites are needed for you to diagnose oligometastases?</b> |          |          |
|--------------------------------------------------------------------------------------|----------|----------|
| <b>Answer</b>                                                                        | <b>#</b> | <b>%</b> |
| 1 site                                                                               | 2        | 5        |
| 2 sites                                                                              | 1        | 3        |
| 3 sites                                                                              | 10       | 26       |
| 4 sites                                                                              | 3        | 8        |
| 5 sites                                                                              | 12       | 32       |
| > 5 sites                                                                            | 6        | 16       |
| Abstain                                                                              | 4        | 11       |

| <b>4.7 Do you offer treatment with MDT for patients with oligorecurrent mHSPC diagnosed by molecular imaging, such as PSMA, choline, FACBC PET/CT?</b> |          |          |
|--------------------------------------------------------------------------------------------------------------------------------------------------------|----------|----------|
| <b>Answer</b>                                                                                                                                          | <b>#</b> | <b>%</b> |
| Usually                                                                                                                                                | 16       | 43       |
| Sometimes                                                                                                                                              | 20       | 54       |
| Never                                                                                                                                                  | 1        | 3        |
| Abstain                                                                                                                                                | 0        | 0        |

| <b>4.8 What is your preferred method of delivering MDT?</b> |          |          |
|-------------------------------------------------------------|----------|----------|
| <b>Answer</b>                                               | <b>#</b> | <b>%</b> |
| Radiotherapy (ie, SABR/SBRT)                                | 33       | 89       |
| Surgical resection/lymphadenectomy                          | 0        | 0        |
| Cryotherapy                                                 | 0        | 0        |
| I never recommend MDT                                       | 1        | 3        |
| Abstain                                                     | 3        | 8        |

| <b>4.9 Do you consider ADT-free interval/survival a meaningful end point for patients?</b> |          |          |
|--------------------------------------------------------------------------------------------|----------|----------|
| <b>Answer</b>                                                                              | <b>#</b> | <b>%</b> |
| Yes                                                                                        | 28       | 76       |
| No                                                                                         | 8        | 22       |
| Abstain                                                                                    | 1        | 3        |

| <b>4.10 Do you routinely add ADT (ie, LHRH agonist or antagonist) to MDT?</b> |          |          |
|-------------------------------------------------------------------------------|----------|----------|
| <b>Answer</b>                                                                 | <b>#</b> | <b>%</b> |
| Usually                                                                       | 17       | 46       |
| Sometimes                                                                     | 19       | 51       |
| Never                                                                         | 1        | 3        |
| Abstain                                                                       | 0        | 0        |

| <b>4.11 How long do you usually recommend ADT if you are adding it to MDT?</b> |          |          |
|--------------------------------------------------------------------------------|----------|----------|
| <b>Answer</b>                                                                  | <b>#</b> | <b>%</b> |
| I don't recommend ADT with MDT                                                 | 2        | 5        |
| 4-6 months                                                                     | 15       | 41       |
| 12 months                                                                      | 5        | 14       |
| 24 months                                                                      | 7        | 19       |
| Lifelong                                                                       | 2        | 5        |
| Abstain                                                                        | 6        | 16       |

| <b>4.12 How long do you usually recommend ADT if you are adding it to MDT?<sup>a</sup></b> |          |          |
|--------------------------------------------------------------------------------------------|----------|----------|
| <b>Answer</b>                                                                              | <b>#</b> | <b>%</b> |
| I don't recommend ADT with MDT                                                             | 3        | 8        |
| 4-6 months                                                                                 | 14       | 38       |
| 12 months                                                                                  | 4        | 11       |
| 24 months                                                                                  | 6        | 16       |
| Lifelong                                                                                   | 2        | 5        |
| Abstain                                                                                    | 8        | 22       |

<sup>a</sup>Question 4.12 was unintentionally a repeat of question 4.11. Because the responses differed between the questions, both sets are included here.

| <b>4.13 Do you intensify systemic therapy with ADT plus ARSI when offering MDT?</b> |          |          |
|-------------------------------------------------------------------------------------|----------|----------|
| <b>Answer</b>                                                                       | <b>#</b> | <b>%</b> |
| Usually                                                                             | 19       | 51       |
| Rarely                                                                              | 8        | 22       |
| Never                                                                               | 5        | 14       |
| Abstain                                                                             | 5        | 14       |

**4.14** If intensifying systemic therapy with ADT plus ARSI and MDT, how long do you give systemic therapy for?

| <b>Answer</b>                                       | <b>#</b> | <b>%</b> |
|-----------------------------------------------------|----------|----------|
| I do not recommend systemic therapy intensification | 5        | 14       |
| 4-6 months                                          | 10       | 27       |
| 12 months                                           | 6        | 16       |
| 24 months                                           | 10       | 27       |
| Lifelong                                            | 2        | 5        |
| Abstain                                             | 4        | 11       |

## 5. mHSPC

| 5.1 Should triplet therapy be given to all patients with mHSPC?                     |    |    |
|-------------------------------------------------------------------------------------|----|----|
| Answer                                                                              | #  | %  |
| Yes                                                                                 | 2  | 5  |
| No                                                                                  | 17 | 46 |
| Only high-risk patients as defined by ARASENS and PEACE1                            | 5  | 14 |
| Only high-risk patients as defined by volume and de novo vs metachronous metastases | 9  | 24 |
| Only high-risk as defined by clinical criteria and next generation sequencing (NGS) | 2  | 5  |
| Abstain                                                                             | 2  | 5  |
| Not sure                                                                            | 0  | 0  |

| 5.2 If you choose triplet therapy in addition to ADT plus docetaxel, which AR pathway inhibitor would you prescribe? |    |    |
|----------------------------------------------------------------------------------------------------------------------|----|----|
| Answer                                                                                                               | #  | %  |
| Abiraterone/prednisone                                                                                               | 5  | 14 |
| Darolutamide                                                                                                         | 15 | 41 |
| Enzalutamide                                                                                                         | 1  | 3  |
| Apalutamide                                                                                                          |    |    |
| Whichever one is covered by insurance with the lowest co-pay and no medical contraindications                        | 13 | 35 |
| Abstain                                                                                                              | 3  | 8  |

| 5.3 Which type of imaging do you prefer to determine extent of disease? |    |    |
|-------------------------------------------------------------------------|----|----|
| Answer                                                                  | #  | %  |
| Conventional imaging (CT plus bone scan)                                | 16 | 43 |
| PSMA PET imaging                                                        | 17 | 46 |
| Other                                                                   | 3  | 8  |
| Abstain                                                                 | 1  | 3  |

### “Other” responses:

- I prefer both
- Sometimes PSMA and conventional
- Both

| 5.4 Do you consider discontinuation of therapy in long-term responders? |    |    |
|-------------------------------------------------------------------------|----|----|
| Answer                                                                  | #  | %  |
| Yes                                                                     | 20 | 54 |
| No                                                                      | 1  | 3  |
| Maybe                                                                   | 15 | 41 |
| Abstain                                                                 | 1  | 3  |

| 5.5 What criterion do you use for treatment discontinuation? |    |    |
|--------------------------------------------------------------|----|----|
| Answer                                                       | #  | %  |
| Complete response (CR) at 6 months                           | 2  | 5  |
| CR at 1 year                                                 | 2  | 5  |
| CR at 2 years                                                | 18 | 49 |
| CR at 5 years                                                | 3  | 8  |
| None of the above                                            | 6  | 16 |
| Abstain                                                      | 6  | 16 |

| 5.6 Which method do you use to assess burden of disease to guide treatment of the primary site?                                                                                                                                                                   |    |    |
|-------------------------------------------------------------------------------------------------------------------------------------------------------------------------------------------------------------------------------------------------------------------|----|----|
| Answer                                                                                                                                                                                                                                                            | #  | %  |
| Number of bone metastases                                                                                                                                                                                                                                         | 3  | 8  |
| Low vs high volume of disease per CHAARTED (high volume defined as the presence of visceral metastases or $\geq 4$ bone lesions with $\geq 1$ beyond the vertebral bodies and pelvis)                                                                             | 25 | 68 |
| Low vs high risk per LATITUDE (high risk defined as $\geq 2$ of the 3 following high-risk factors associated with poor prognosis: a Gleason score of $\geq 8$ [on a scale of 2 to 10], $\geq 3$ bone lesions, and the presence of measurable visceral metastasis) | 1  | 3  |
| None of the above                                                                                                                                                                                                                                                 | 6  | 16 |
| Abstain                                                                                                                                                                                                                                                           | 2  | 5  |

| 5.7 Do you recommend the treatment of the primary site in patients with de novo mHSPC and a low burden of disease? |    |    |
|--------------------------------------------------------------------------------------------------------------------|----|----|
| Answer                                                                                                             | #  | %  |
| Usually                                                                                                            | 32 | 86 |
| Sometimes                                                                                                          | 3  | 8  |
| Never                                                                                                              | 1  | 3  |
| Abstain                                                                                                            | 1  | 3  |

| 5.8 Which treatment method do you most commonly recommend for treatment of the primary site in patients with de novo mHSPC and a low volume disease? |    |    |
|------------------------------------------------------------------------------------------------------------------------------------------------------|----|----|
| Answer                                                                                                                                               | #  | %  |
| Radiotherapy (lower doses per STAMPEDE)                                                                                                              | 16 | 43 |
| Radiotherapy (higher doses used in localized prostate cancer)                                                                                        | 14 | 38 |
| Surgery with or without postoperative radiotherapy                                                                                                   | 3  | 8  |
| Other ablative therapies (ie, cryotherapy)                                                                                                           | 2  | 5  |
| I do not recommend treatment of the primary site in these patients                                                                                   | 1  | 3  |
| Abstain                                                                                                                                              | 1  | 3  |

| <b>5.9 Do you recommend treatment of the primary site in patients with de novo mHSPC and a high volume of disease?</b> |          |          |
|------------------------------------------------------------------------------------------------------------------------|----------|----------|
| <b>Answer</b>                                                                                                          | <b>#</b> | <b>%</b> |
| Usually                                                                                                                | 2        | 5        |
| Sometimes                                                                                                              | 23       | 62       |
| Never                                                                                                                  | 11       | 30       |
| Abstain                                                                                                                | 1        | 3        |

| <b>5.10 Which treatment do you most commonly recommend for treatment of the primary site in patients with de novo mHSPC and a high volume of disease?</b> |          |          |
|-----------------------------------------------------------------------------------------------------------------------------------------------------------|----------|----------|
| <b>Answer</b>                                                                                                                                             | <b>#</b> | <b>%</b> |
| Radiotherapy (lower doses per STAMPEDE)                                                                                                                   | 9        | 24       |
| Radiotherapy (higher doses used in localized prostate cancer)                                                                                             | 7        | 19       |
| Surgery with or without postoperative radiotherapy                                                                                                        | 3        | 8        |
| Other ablative therapies (ie, cryotherapy)                                                                                                                | 1        | 3        |
| I do not recommend treatment of the primary in these patients                                                                                             | 16       | 43       |
| Abstain                                                                                                                                                   | 1        | 3        |

| <b>5.11 Is it clinically meaningful to patients if treatment of the primary site could improve failure-free survival, analogous to time to development of mCRPC, without an increase in bothersome toxicity?</b> |          |          |
|------------------------------------------------------------------------------------------------------------------------------------------------------------------------------------------------------------------|----------|----------|
| <b>Answer</b>                                                                                                                                                                                                    | <b>#</b> | <b>%</b> |
| Yes                                                                                                                                                                                                              | 29       | 78       |
| No                                                                                                                                                                                                               | 2        | 5        |
| Not sure                                                                                                                                                                                                         | 5        | 14       |
| I do not recommend treatment of the primary in these patients                                                                                                                                                    | 0        | 0        |
| Abstain                                                                                                                                                                                                          | 1        | 3        |

| <b>5.12 How many bone metastases do you use as a threshold to not offer treatment of the primary site?</b>                        |          |          |
|-----------------------------------------------------------------------------------------------------------------------------------|----------|----------|
| <b>Answer</b>                                                                                                                     | <b>#</b> | <b>%</b> |
| 3                                                                                                                                 | 4        | 11       |
| 5                                                                                                                                 | 21       | 57       |
| 7                                                                                                                                 | 3        | 8        |
| 9                                                                                                                                 | 2        | 5        |
| I do not recommend treatment of the primary site or do not use a certain number of bone metastases to influence my recommendation | 4        | 11       |
| Abstain                                                                                                                           | 3        | 8        |

| <b>5.13 STAMPEDE demonstrated benefit of treatment of the primary site with EBRT in patients treated with ADT or ADT plus docetaxel. If a patient is treated with ADT plus ARSI, does this change your recommendations of adding treatment of the primary site for patients with low-volume/oligometastatic disease?</b> |          |          |
|--------------------------------------------------------------------------------------------------------------------------------------------------------------------------------------------------------------------------------------------------------------------------------------------------------------------------|----------|----------|
| <b>Answer</b>                                                                                                                                                                                                                                                                                                            | <b>#</b> | <b>%</b> |
| Yes, I am more likely to offer treatment of the primary site with ADT plus ARSI, given the synergy of AR inhibition and EBRT                                                                                                                                                                                             | 11       | 30       |
| Yes, I am less likely to offer treatment of the primary with ADT plus ARSI                                                                                                                                                                                                                                               | 3        | 8        |
| No, the use of ARSI or docetaxel does not impact offering treatment of the primary site                                                                                                                                                                                                                                  | 20       | 54       |
| Abstain                                                                                                                                                                                                                                                                                                                  | 3        | 8        |

| <b>5.14 What treatment would you recommended to add to ADT for patients at high risk for financial toxicity and/or treatment noncompliance for oligometastatic/low burden de novo mHSPC?</b> |          |          |
|----------------------------------------------------------------------------------------------------------------------------------------------------------------------------------------------|----------|----------|
| <b>Answer</b>                                                                                                                                                                                | <b>#</b> | <b>%</b> |
| Docetaxel                                                                                                                                                                                    | 7        | 19       |
| Abitaterone until progression                                                                                                                                                                | 10       | 27       |
| Treatment of the primary                                                                                                                                                                     | 10       | 27       |
| None of the above                                                                                                                                                                            | 5        | 14       |
| Abstain                                                                                                                                                                                      | 5        | 14       |

| <b>5.15 How would you classify a Patient who is low volume on conventional imaging and high volume on PSMA PET CT?</b> |          |          |
|------------------------------------------------------------------------------------------------------------------------|----------|----------|
| <b>Answer</b>                                                                                                          | <b>#</b> | <b>%</b> |
| Low Volume                                                                                                             | 25       | 69       |
| High Volume                                                                                                            | 8        | 22       |
| Abstain                                                                                                                | 3        | 8        |
